# Supplementary material for: Readers of PCNA modifications
Source: PubMed Central journal article supplement — Chromosoma. 2013 Apr 12;122(4):259–74. doi: 10.1007/s00412-013-0410-4 (PMC3714560; doi:10.1007/s00412-013-0410-4), 2013-04-12

# Ulrich and Takahashi – Supplementary Figure 1

**a**

|    | Rad18:                                                                | RING                                     |      |
|----|-----------------------------------------------------------------------|------------------------------------------|------|
| Sc | -MD-----HQITASDFTTTSIPSLYQLDTLRCHICKDFLKVPLVLT                        | CGHTFCSLCIRTHLNNQPN-CPLCLFEFRESLLRSEF    | 78   |
| Nc | -MN-----QLALNTRKDFKTKIPKLEIDTLRCHICKDFLKVPLVLT                        | CSHTFCSLCIREYLKDNKSK-CPLCLNELRESMLRSEF   | 78   |
| Cg | -MD-----VLTSAADFKKSKVPQLQELDDLRRCHICKDFLKNPVLT                        | CGHTFCSLCIRGYLSNEPK-CPLCLHELRESMLRSEF    | 77   |
| Tp | -MN-----NSVSDPTDYAKSSIPKLSQLDSSLRCHICKNFKNPVLT                        | CSHTFCSLCIRMLYLSKEAK-CPLCLKEVRESMLRSEF   | 78   |
| Zr | -MN-----YVSDATDFSHSTIPQLSOLDTLRCHICKDCLKIPVLT                         | CSHTFCSLCIREYLTREPK-CPLCLSELRESMLRSEF    | 78   |
| Lt | -MSRPLKSEIQDVSDDPRDLRKLPELVDLTLRCHICKGFIKTPVLT                        | CGHTFCSLCIREYLNRELK-CPLCLAEELRESMLRSEF   | 87   |
| Kl | -MKLSVP-----ETISNPRDFLHTSVPQLTDDLSSLRCHICKDFLKASVLT                   | CGHSFCSLCIRKYLQKESK-CPLCLSDLTESMLRSEF    | 82   |
| Ag | -MSIQPG-----QVVTDPDFAGTTIPELADLSSLRCHICKDMLQTPVLT                     | CGHTFCSLCIREYLNKESR-CPLCLAEELRQNLQKQEF   | 82   |
| Ec | MTAKLD-----AEVSNPSDFQGTLLIPEIADIDLRRCHICKDFLQTPVLGH                   | CGHTFCSLCIRTYLNKEAR-CPLCLVELRQNLQKQEF    | 83   |
| Dh | -MNSNPF--TKNLQNVTPDSDWEPTKLPNLKELDSLQRCYICKEFLKAPVITS                 | CNHTFCSHCIREYLVNNSH-CPLCKAEQFESNLKRVI    | 86   |
| Mg | -MD-NPF--ANNLQNVTPDSDFKSTKMPKLTDELALQRCFICKEFMKAPMPTS                 | CNHTFCSHCIREYLVNNSH-CPLCKTEQFESNLKRVI    | 85   |
| Ca | -MN-----LKDITDPSDFKTKLPAELDLKRCYICKDLLNAPVLTQ                         | CDHTYCSQCIREFLLRDNR-CPLCKTEVFESGLKRD     | 79   |
| Yl | -MN-----SDIPDPSDWIDSKLSGLKVDVETLRCHICKEFFTAPMITG                      | CGHTFCSLCIQRYLTNTSQRCPCTMQEQQISQLRKNV    | 79   |
| Sp | -MN-----ELDATDPSDWNQTKIPSLKGLDSSLRCLICHEYFRAPLITS                     | CSHTFCSFCIRDYLRHHPM-CPACRAPEQESRLRKN     | 77   |
| Xt | -----MATPEPGSKAKGQPVQDLDLRLCAICFDYIYIYIIPQCSHNYCSLC                   | IRKFLSYKTQ-CPTCCVAEAPDLRNNR              | 77   |
| Gg | -----MALALPEP--PWASLTPLKAVDLDLRCGICFDYFYSIAVI                         | IPQCSHNYCSLCIRKFLSYKTQ-CPTCCVAEAPDLRNNR  | 77   |
| Hs | -----MDSLAES--RWPPGLAVMKTIDDLRLCGICFEYFNIAI                           | IPQCSHNYCSLCIRKFLSYKTQ-CPTCCVTVTEPDLKNNR | 76   |
|    |                                                                       |                                          |      |
| Sc | LVSEIIQSYTSLRSSLLDALRIPKPTVPENEEVPGP--ENSSWIELISESESDSVN              | -----AA---DDDLQIVATS---ERKL-A            | 150  |
| Nc | LVNEIVQSYQSLRSDLLLECLKI-----EPRS---TETSILEESEPDLEIKGSSKALFNIST        | ---DDDLQIVGTM---ERP--R                   | 147  |
| Cg | LVNEITETKAAQRLLDDELNSLETNQDNSVIEVSD--KEPSLLQIDDDVNENSN                | -----HITV---NDTSDIIDEDNEIQI'G-T          | 153  |
| Tp | LVNEIVGSYTNIRDELLANLKK-----QEARQDG-QDISIVEVESDESSELQVLD               | -----IE---EDTKQYISKQ---LSNQ-R            | 143  |
| Zr | LVNEIIESYRSVRDELLESKE-----DQRNN--AEKSLIELTD--D-----DN                 | ---DDDLQIVGTM---QKEE-V                   | 133  |
| Lt | LVNEIIVASVGLRSLKLEIARSG--P-----DGTVPH--SDTSLIEIAPGDEGAH               | -----EL--SG---DDDLQIETR---RNRP-A         | 152  |
| Kl | LVQEICSSYVVKLRGSLQKHLT-----IS-SQ-----EE-----EK--DNEIISDEAD            | ---TSVG-T                                | 127  |
| Ag | LVGELAACYMELRARLLETVR-----IPPK--KVAEVVQNNSP---IEL-----DS              | ---DGEVEIIESCT---GAVPGS                  | 140  |
| Ec | LLGEIVASYSRIRGRMLLENLDN-----RHAK--RPAQVAKSSASK-IEI-----IS             | ---DDDIQILDSGQ---SSPD-M                  | 143  |
| Dh | LLEEIVLCFSKFRPILLELKKK-----ESNEAYDKNRSPFSEIPSKDSDSRKR                 | -----S---SPDQVEIETSS--DENSL              | 153  |
| Mg | LLEEINCYVALRHDLLSVIGNE-----IS-----P--ENEQK-----QEIEVSD                | ---EEP---                                | 127  |
| Ca | LLEEIVVSYASLRPHLLRLEIEIK-----VESKQEVDRKESANESASNGNRNVND               | -----V---DETARVKDQSN--ADELGE             | 148  |
| Yl | TVETLVEHFSQAQRATILRVVK-----EAA-----K---QPIEVVEPPSSPDLDGDR             | -----K---                                | 123  |
| Sp | ILLEELESFVIRPRTLFEFLK-----VEN--VPKPVLOAP-----ETVIAQDSAS               | ---GDEEVE                                | 128  |
| Xt | ILDDLKVTIFISARQHLKSVVLDSPMS--PQSNPSTSKIAKMQG--CTGKQVQKQENI            | IMNRFLVKGNCSTPRTHSNTLQDTEFLSQDSSYT       | 164  |
| Gg | TLDELVKSPSSARQQLVQLVLDTPLISSPLACSRRSIGKNSKTPASLPVVKEEVPI              | IDSFLKKNVCTL-TKTDGLAGTDWKVCKTFEEH        | 166  |
| Hs | ILDELVKSLNFARNHLLQFALESPAKS--PASSSSKNLAVKVTYTPVASRQSLKQGSRL           | MDNFLIREMSG---STSELLIKENKSKFSPQKE        | 162  |
|    |                                                                       |                                          |      |
|    | UBZ                                                                   | Srs2:                                    |      |
| Sc | KR-S-MTDILPLSSKPSKR----NFAMFRSERIKKSKPNEQMAQCPCIQQFYPLKALEKTHLDEC     | ...KLNNGEIIVD                            | 1174 |
| Nc | KRLA-STTFIGKANKSNTYK-RPSSFQSVLKGSTDR--KKNQPOAQPCIQEAFPIQVLESHLDEC     | ...KTNKGEIIVD                            | 1147 |
| Cg | KR---TARTILNGSRPTKA----AKISDMFTTRKAK--T--EEKAPCPCISQLFPIRYLERLTHLDEC  | ...KLNDSEIIVD                            | 1088 |
| Tp | NRIN--NSHMTKVKTKKSN-----IHSFLKSKSNDIMLKNSQLIECPVCSKMVPKQTLSEHLDKC     | ...KGNNSIIVD                             | 1086 |
| Zr | KRDK-NEKSVGKVTKPSTS---TGLNSLLNSQRDKS-KTKEKLAQPCICSNFYPIQALERTHLDEC    | ...KMNDGEIIVD                            | 1161 |
| Lt | KR---NAEIVLMPKSKSRDSEKPGISSMISKSKSP--ALPEDSAECPICQKHFPLEYLQRTHLDEC    | ...DSDKDTIIVD                            | 1190 |
| Kl | KRGTPDPSPLSSVSTKTKR---KHDGITLLMKKKTDPHQREQKAQPCISKHLPLSELEGSHIDEC     | ...EEWDGEIIDLRSQ                         | 1064 |
| Ag | KRGSPQVEVEAAAKRQRT--KQNGIQYMLQKK---PKAVGKVPCCPCINRNLNKEFLERHLDEC      | ...PSINDEIIVD                            | 1131 |
| Ec | KRSAPVTEFEVVISKRPRA--KKNGIQSLLSRK---SKIRDNTVECPICNKSFSKDFLERTHLDEC    | ...PTISDEIIVD                            | 1185 |
| Dh | EL---SEASNDVPKKIKI---EINSNSRN---AIPTRNEMVECPICAEVMSADLLQTHIDYC        | .....                                    | 934  |
| Mg | -----PLKKHKN---AA-----AIPTRDELVDPCICSRKMTAQLVQSRHIDEC                 | .....                                    | 830  |
| Ca | EK---QQAQHGQVNEQTT-----EVISLSDS---EENGSDSLVKPCICFERMELDVQKGKIDDC      | .....                                    | 859  |
| Yl | RR-----SGRKRTRTNYT-----ETLVSSD---D---IQVECPVQAMLPGAAINRHLNDC          | .....                                    | 820  |
| Sp | DDLASNSPASIAKKTSRD-----SKK---RKREDLVHCPACSNLVPHNQIN-QHLDSC            | .....                                    | 887  |
| Xt | SANTSNIDLAGEAGSVMTEFTF--GTFSPSTSAALAPSSASKV-RVDCPVCVGSIPPEQYIN-KHLDSC | 227 /                                    |      |
| Gg | HSSSSSPAGSKDNKAGSRE--CSEGTNSGKPTSVVVKVNVKDCPVCVGAIPPEYIN-KHLDSC       | 230 /                                    |      |
| Hs | ASPAAKTKETRSVEEIIAPDP---SEAKRP-EPPSTSTLQVTKVDCPVCVGNIPESHIN-KHLDSC    | 223 /                                    |      |

**Fig. S1.** Conservation of SIMs in Rad18 and Srs2. **a** Sequence alignment of the N-terminal regions of Rad18 (spanning the RING and UBZ domains) and the C-termini of Srs2 in selected yeast and vertebrate species. Red: High-probability SIM, based on homology with the *S. cerevisiae* genes. Green: high-probability SIM in reverse orientation. Orange: possible SIM. Alignments were performed with Clustal-W. **b** Phylogenetic tree of the relevant species and their classifications. Note that the tree branches are not to scale (adapted from Dujon 2010 and Kurtzman and Robnett 2003).

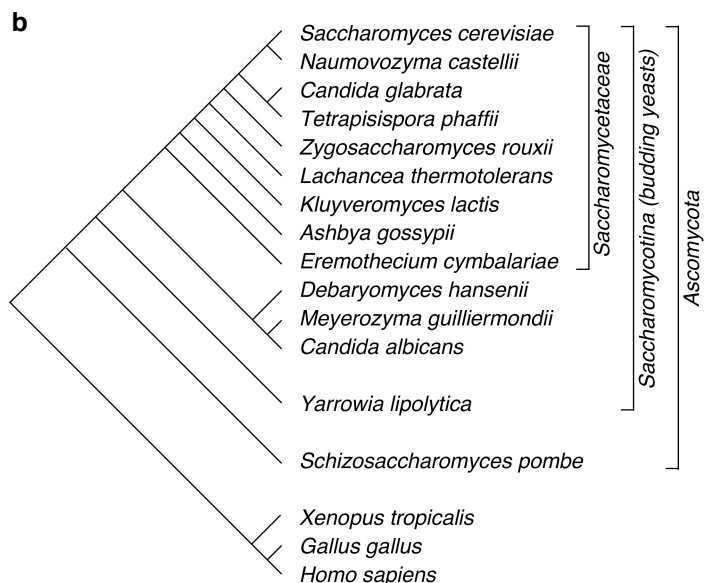

Supplement: 412_2013_410_MOESM1_ESM.pdf [file 412_2013_410_MOESM1_ESM.pdf]
